# Supplementary material for: Transit Behaviour and Sociodemographic Interrelation: Enhancing Urban Public-Transport Solutions
Source: MDPI journal article supplement (doi:10.3390/eng4020066), 2023-04-14
Supplement: s1 [file s1]

**Table A.1** Questionnaire sample (English version) used for this study

| No.         | Question                                                                                                                                                                                                                                                                                                                                                                                      |
|-------------|-----------------------------------------------------------------------------------------------------------------------------------------------------------------------------------------------------------------------------------------------------------------------------------------------------------------------------------------------------------------------------------------------|
| <b>Q1</b>   | <b>Day of the survey?</b>                                                                                                                                                                                                                                                                                                                                                                     |
|             | 1. <i>Weekday</i>   2. <i>Weekend</i>                                                                                                                                                                                                                                                                                                                                                         |
| <b>Q2</b>   | Where do you live? ( <i>Insert area number</i> )                                                                                                                                                                                                                                                                                                                                              |
| <b>Q3</b>   | Where did you start this journey? ( <i>Insert area number</i> )                                                                                                                                                                                                                                                                                                                               |
| <b>Q4</b>   | How long did it take you to get to the bus stop? ( <i>Insert time</i> )                                                                                                                                                                                                                                                                                                                       |
| <b>Q5</b>   | Where are you travelling to? ( <i>Insert area number</i> )                                                                                                                                                                                                                                                                                                                                    |
|             | <b>What type of ticket do you have for this journey?</b>                                                                                                                                                                                                                                                                                                                                      |
| <b>Q6</b>   | 1. <i>Single (paid cash to driver)</i>   2. <i>Smartcard – Ojra – day pass</i><br>3. <i>Smartcard – Ojra – monthly pass</i>   4. <i>Smartcard – Ojra – senior citizen pass</i><br>5. <i>Smartcard – Ojra – special need pass</i>                                                                                                                                                              |
|             | <b>What is the purpose of your journey today?</b>                                                                                                                                                                                                                                                                                                                                             |
| <b>Q7</b>   | 1. <i>Commuting to/from work</i>   2. <i>Travelling to/from education</i><br>3. <i>On company business</i>   4. <i>Personal reason (doctor/immigration)</i><br>5. <i>Shopping</i>   6. <i>Leisure/visiting friends and family</i>                                                                                                                                                             |
|             | <b>How often do you make this journey by bus?</b>                                                                                                                                                                                                                                                                                                                                             |
| <b>Q8a</b>  | 1. <i>“5 or more times a week”</i>   2. <i>“2-4 times a week”</i><br>3. <i>Once a week</i>   4. <i>“1-3 times a month”</i><br>5. <i>Less often</i>   6. <i>First time</i><br>7. <i>Never</i>                                                                                                                                                                                                  |
|             | <b>How often do you make this journey by car/taxi/walk?</b>                                                                                                                                                                                                                                                                                                                                   |
| <b>Q8b</b>  | 1. <i>“5 or more times a week”</i>   2. <i>“2-4 times a week”</i><br>3. <i>Once a week</i>   4. <i>“1-3 times a month”</i><br>5. <i>Less often</i>   6. <i>First time</i><br>7. <i>Never</i>                                                                                                                                                                                                  |
| <b>Q9</b>   | <b>Which of these statements do you agree with? (Tick all that apply)</b>                                                                                                                                                                                                                                                                                                                     |
|             | 1. <i>I like to live close to where I work</i>   2. <i>I like to live close to my family and friends</i><br>3. <i>Travel by bus is the easiest way for me</i>   4. <i>I cannot afford to travel by car or taxi</i><br>5. <i>The buses are too crowded</i>   6. <i>I would pay more to travel by bus if I always had a seat</i><br>7. <i>My journey is often delayed by traffic congestion</i> |
| <b>Q10</b>  | <b>How satisfied are you with the following aspects of bus service here?</b>                                                                                                                                                                                                                                                                                                                  |
| <b>Q10A</b> | <b>Journey time</b>                                                                                                                                                                                                                                                                                                                                                                           |
|             | 1. <i>Very Satisfied</i>   2. <i>Satisfied</i><br>3. <i>Neutral</i>   4. <i>Dissatisfied</i><br>5. <i>Very Dissatisfied</i>   6. <i>Blank</i>                                                                                                                                                                                                                                                 |
|             | <b>Frequency</b>                                                                                                                                                                                                                                                                                                                                                                              |
| <b>Q10B</b> | 1. <i>Very Satisfied</i>   2. <i>Satisfied</i><br>3. <i>Neutral</i>   4. <i>Dissatisfied</i><br>5. <i>Very Dissatisfied</i>   6. <i>Blank</i>                                                                                                                                                                                                                                                 |
|             | <b>Network coverage</b>                                                                                                                                                                                                                                                                                                                                                                       |
| <b>Q10C</b> | 1. <i>Very Satisfied</i>   2. <i>Satisfied</i><br>3. <i>Neutral</i>   4. <i>Dissatisfied</i><br>5. <i>Very Dissatisfied</i>   6. <i>Blank</i>                                                                                                                                                                                                                                                 |
|             | <b>Level of fares</b>                                                                                                                                                                                                                                                                                                                                                                         |
| <b>Q10D</b> | 1. <i>Very Satisfied</i>   2. <i>Satisfied</i>                                                                                                                                                                                                                                                                                                                                                |

|      |                                                    |                                 |
|------|----------------------------------------------------|---------------------------------|
|      | 3. <i>Neutral</i>                                  | 4. <i>Dissatisfied</i>          |
|      | 5. <i>Very Dissatisfied</i>                        | 6. <i>Blank</i>                 |
|      | <b>Bus Stop Waiting Area</b>                       |                                 |
| Q10E | 1. <i>Very Satisfied</i>                           | 2. <i>Satisfied</i>             |
|      | 3. <i>Neutral</i>                                  | 4. <i>Dissatisfied</i>          |
|      | 5. <i>Very Dissatisfied</i>                        | 6. <i>Blank</i>                 |
|      | <b>Quality of ride</b>                             |                                 |
| Q10F | 1. <i>Very Satisfied</i>                           | 2. <i>Satisfied</i>             |
|      | 3. <i>Neutral</i>                                  | 4. <i>Dissatisfied</i>          |
|      | 5. <i>Very Dissatisfied</i>                        | 6. <i>Blank</i>                 |
|      | <b>Gender</b>                                      |                                 |
| Q11A | 1. <i>Male</i>                                     | 2. <i>Female</i>                |
|      | <b>Nationality</b>                                 |                                 |
|      | 1. <i>UAE</i>                                      | 2. <i>Europe/USA/Australia</i>  |
| Q11B | 3. <i>Other Middle East &amp; GCC Countries</i>    | 4. <i>Africa</i>                |
|      | 5. <i>India/Pakistan/Srilanka/Bangladesh</i>       | 6. <i>Philippines</i>           |
|      | 7. <i>Chinese &amp; other South Asia</i>           | 8. <i>Other</i>                 |
|      | <b>Age</b>                                         |                                 |
| Q11C | 1. <i>Under 16</i>                                 | 2. <i>16-24</i>                 |
|      | 3. <i>25-34</i>                                    | 4. <i>35-44</i>                 |
|      | 5. <i>45-64</i>                                    | 6. <i>65+</i>                   |
| Q11D | <b>Number of cars in household (insert number)</b> |                                 |
| Q11E | <b>Do you hold a UAE valid driving licence</b>     |                                 |
|      | 1. <i>Yes</i>                                      | 2. <i>No</i>                    |
|      | <b>Gross monthly income (AED)</b>                  |                                 |
| Q11F | 1. <i>Under 1,000</i>                              | 2. <i>1,000-3,000</i>           |
|      | 3. <i>3,001-5,000</i>                              | 4. <i>5,001-10,000</i>          |
|      | 5. <i>10,001-20,000</i>                            | 6. <i>Over 20,000</i>           |
|      | <b>What type of accomodation do you live?</b>      |                                 |
| Q11G | 1. <i>Villa</i>                                    | 2. <i>Residential Apartment</i> |
|      | 3. <i>Serviced Apartment</i>                       | 4. <i>Hotel</i>                 |
|      | 5. <i>Labour camp</i>                              | 6. <i>Other</i>                 |
|      | <b>What is your annual rent? (AED)</b>             |                                 |
| Q11H | 1. <i>Under 10,000</i>                             | 2. <i>10,000-20,000</i>         |
|      | 3. <i>20,001 – 40,000</i>                          | 4. <i>40,001 – 60,000</i>       |
|      | 5. <i>60,001 -100,000</i>                          | 6. <i>Over 100,000</i>          |
|      | <b>Employment status</b>                           |                                 |
| Q11I | 1. <i>Work full-time</i>                           | 2. <i>Work part-time</i>        |
|      | 3. <i>Seeking work</i>                             | 4. <i>Student</i>               |
|      | 5. <i>Visitor</i>                                  | 6. <i>Retired</i>               |
|      | <b>Type of work (if working)</b>                   |                                 |
| Q11J | 1. <i>Professional</i>                             | 2. <i>Healthcare</i>            |
|      | 3. <i>Teaching</i>                                 | 4. <i>Customer facing</i>       |
|      | 5. <i>Construction</i>                             | 6. <i>Industrial</i>            |
|      | 7. <i>Domestic workers</i>                         | 8. <i>Delivery</i>              |
|      | 9. <i>Other</i>                                    |                                 |

**Table A.2** Statistical descriptive distribution of the collected variables

| No.  | Variable                                                                    | Mean | Standard Deviation | Variance |
|------|-----------------------------------------------------------------------------|------|--------------------|----------|
| Q2   | Where do you live? ( <i>Insert area number</i> )                            | 3.76 | 1.814              | 3.291    |
| Q3   | Where did you start this journey? ( <i>Insert area number</i> )             | 3.35 | 1.845              | 3.405    |
| Q4   | How long did it take you to get to the bus stop? ( <i>Insert time</i> )     |      |                    |          |
| Q5   | Where are you travelling to? ( <i>Insert area number</i> )                  | 3.38 | 1.823              | 3.323    |
| Q6   | What type of ticket do you have for this journey?                           | 1.32 | 0.732              | 0.536    |
| Q7   | What is the purpose of your journey today?                                  | 3.25 | 2.130              | 4.539    |
| Q8a  | How often do you make this journey by bus?                                  | 5.20 | 1.149              | 1.321    |
| Q8b  | How often do you make this journey by car/taxi/walk?                        | 2.94 | 1.414              | 2.000    |
| Q9   | Which of these statements do you agree with? ( <i>Tick all that apply</i> ) |      |                    |          |
| Q9A  | <i>I like to live close to where I work</i>                                 | 4.70 | 2.70               | 7.301    |
| Q9B  | <i>I like to live close to my family and friends</i>                        | 0.66 | 0.472              | 0.223    |
| Q9C  | <i>Travel by bus is the easiest way for me</i>                              | 0.66 | 0.475              | 0.226    |
| Q9D  | <i>I cannot afford to travel by car or taxi</i>                             | 0.45 | 0.497              | 0.247    |
| Q9E  | <i>The buses are too crowded</i>                                            | 0.60 | 0.489              | 0.240    |
| Q9F  | <i>I would pay more to travel by bus if I always had a seat</i>             | 0.36 | 0.479              | 0.229    |
| Q9G  | <i>My journey is often delayed by traffic congestion</i>                    | 0.35 | 0.478              | 0.228    |
| Q10A | How satisfied are you with journey time of buses?                           | 3.95 | 0.826              | 0.682    |
| Q10B | How satisfied are you with frequency of buses?                              | 3.70 | 0.899              | 0.809    |
| Q10C | How satisfied are you with network coverage of buses?                       | 3.74 | 0.890              | 0.793    |
| Q10D | How satisfied are you with level of fares of buses?                         | 3.37 | 1.351              | 1.824    |
| Q10E | How satisfied are you with bus stop waiting area?                           | 2.10 | 0.676              | 0.457    |
| Q10F | How satisfied are you with quality of ride on buses?                        | 3.98 | 0.976              | 0.953    |
| Q11A | Gender                                                                      | 1.13 | 0.333              | 0.111    |
| Q11B | Nationality                                                                 | 5.02 | 1.070              | 1.145    |
| Q11C | Age                                                                         | 3.21 | 0.923              | 0.851    |
| Q11D | Number of cars in household ( <i>insert number</i> )                        | 0.17 | 0.392              | 0.153    |
| Q11E | Do you hold a UAE valid driving licence                                     | 1.79 | 0.411              | 0.169    |
| Q11F | Gross monthly income (AED)                                                  | 2.47 | 1.048              | 1.099    |
| Q11G | What type of accommodation do you live?                                     | 2.52 | 1.390              | 1.933    |
| Q11H | What is your annual rent? (AED)                                             | 2.09 | 1.252              | 1.566    |
| Q11I | What is your employment status?                                             | 5.55 | 1.103              | 1.216    |
